# Supplementary material for: A tRNA modification in Mycobacterium tuberculosis facilitates optimal intracellular growth
Source: bioRxiv preprint, doi:10.1101/2023.02.20.529267, version 2 (2023-06-09)
Supplement: Supplementary Table 1 [file 529267_file06.xlsx]

## Sheet: Supplementary Table 1
From	Entry	Entry Name	Protein names	Modomics name	Gene Names	Organism	Domain	Initial	Length	Gene Names (ordered locus)	RefSeq	Gene Names (ORF)	Gene Names (synonym)
O67789	O67789	O67789_AQUAE	MnmC-like methyltransferase domain-containing protein	MnmD	aq_1980	Aquifex aeolicus (strain VF5)	B	AA	308		NP_214358.1;WP_010881294.1;	aq_1980
O66962	O66962	MNMG_AQUAE	tRNA uridine 5-carboxymethylaminomethyl modification enzyme MnmG (Glucose-inhibited division protein A)	MnmG	mnmG gidA aq_761	Aquifex aeolicus (strain VF5)	B	AA	617	aq_761	NP_213523.1;WP_010880461.1;		gidA
O67010	O67010	TRM1_AQUAE	tRNA (guanine(26)-N(2)/guanine(27)-N(2))-dimethyltransferase (EC 2.1.1.215)	Trm1	trm1 aq_841	Aquifex aeolicus (strain VF5)	B	AA	392	aq_841	NP_213571.1;WP_010880509.1;
Q9S7I0	Q9S7I0	TADA_ARATH	tRNA(adenine(34)) deaminase, chloroplastic (TADA) (EC 3.5.4.33) (tRNA adenosine deaminase arginine) (tRNA arginine adenosine deaminase)	TadA	TADA At1g68720 F14K14.18 F24J5.5	Arabidopsis thaliana (Mouse-ear cress)	E	AT	1307	At1g68720	NP_177039.1;	F14K14.18 F24J5.5
O28025	O28025	TIAS_ARCFU	tRNA(Ile2) 2-agmatinylcytidine synthetase TiaS (tRNA(Ile2)-agm2C synthetase) (EC 6.3.4.22) (tRNA(Ile2) agmatidine synthetase)	TiaS	tiaS AF_2259	Archaeoglobus fulgidus (strain ATCC 49558 / DSM 4304 / JCM 9628 / NBRC 100126 / VC-16)	A	AF	420	AF_2259	WP_010879748.1;
P54462	P54462	MTAB_BACSU	Threonylcarbamoyladenosine tRNA methylthiotransferase MtaB (EC 2.8.4.5) (tRNA-t(6)A37 methylthiotransferase)	MtaB	mtaB tmtB yqeV BSU25430	Bacillus subtilis (strain 168)	B	BS	451	BSU25430	NP_390421.1;WP_003230017.1;		tmtB yqeV
O31678	O31678	QUEF_BACSU	NADPH-dependent 7-cyano-7-deazaguanine reductase (EC 1.7.1.13) (7-cyano-7-carbaguanine reductase) (NADPH-dependent nitrile oxidoreductase) (PreQ(0) reductase)	QueF	queF ykvM BSU13750	Bacillus subtilis (strain 168)	B	BS	165	BSU13750	NP_389258.1;WP_003218613.1;		ykvM
O34522	O34522	TRMB_BACSU	tRNA (guanine-N(7)-)-methyltransferase (EC 2.1.1.33) (BsTrmB) (tRNA (guanine(46)-N(7))-methyltransferase) (tRNA(m7G46)-methyltransferase)	TrmB	trmB ytmQ BSU29900	Bacillus subtilis (strain 168)	B	BS	213	BSU29900	NP_390868.1;WP_004398646.1;		ytmQ
P39815	P39815	TRMFO_BACSU	Methylenetetrahydrofolate--tRNA-(uracil-5-)-methyltransferase TrmFO (EC 2.1.1.74) (Folate-dependent tRNA (uracil-5-)-methyltransferase) (Folate-dependent tRNA(M-5-U54)-methyltransferase)	TrmFO	trmFO gid ylyC BSU16130	Bacillus subtilis (strain 168)	B	BS	435	BSU16130	NP_389495.1;WP_003244725.1;		gid ylyC
P54471	P54471	TRMK_BACSU	tRNA (adenine(22)-N(1))-methyltransferase (EC 2.1.1.217) (TrMet(m1A22)) (tRNA(m1A22)-methyltransferase) (tRNA(m1A22)MTase)	TrmK	trmK yqfN BSU25180	Bacillus subtilis (strain 168)	B	BS	238	BSU25180	NP_390397.1;WP_003246178.1;		yqfN
O32036	O32036	TRMR_BACSU	tRNA 5-hydroxyuridine methyltransferase (EC 2.1.1.-) (ho5U methyltransferase)	TrmR	trmR yrrM BSU27360	Bacillus subtilis (strain 168)	B	BS	217	BSU27360	NP_390614.1;WP_003229800.1;		yrrM
O05515	O05515	TSAE_BACSU	tRNA threonylcarbamoyladenosine biosynthesis protein TsaE (t(6)A37 threonylcarbamoyladenosine biosynthesis protein TsaE)	TsaE	tsaE ydiB BSU05910	Bacillus subtilis (strain 168)	B	BS	158	BSU05910	NP_388472.1;WP_003234079.1;		ydiB
O32034	O32034	TRHP1_BACSU	tRNA hydroxylation protein P1 (EC 3.4.-.-)	TrhP1	trhP1 yrrO BSU27340	Bacillus subtilis (strain 168)	B	BS	422	BSU27340	NP_390612.1;WP_003229802.1;		yrrO
O32035	O32035	TRHP2_BACSU	tRNA hydroxylation protein P2 (EC 3.4.-.-)	TrhP2	trhP2 yrrN BSU27350	Bacillus subtilis (strain 168)	B	BS	309	BSU27350	NP_390613.1;WP_004399094.1;		yrrN
O34614	O34614	YTQB_BACSU	Putative rRNA methylase YtqB (EC 2.1.1.-)	MnmR	ytqB BSU30490	Bacillus subtilis (strain 168)	B	BS	194	BSU30490	NP_390927.1;WP_004398483.1;
O32036	O32036	TRMR_BACSU	tRNA 5-hydroxyuridine methyltransferase (EC 2.1.1.-) (ho5U methyltransferase)	TrmR	trmR yrrM BSU27360	Bacillus subtilis (strain 168)	B	BS	217	BSU27360	NP_390614.1;WP_003229800.1;		yrrM
Q8KAS1	Q8KAS1	MNME_CHLTE	tRNA modification GTPase MnmE (EC 3.6.-.-)	MnmE	mnmE thdF trmE CT2084	Chlorobaculum tepidum (strain ATCC 49652 / DSM 12025 / NBRC 103806 / TLS) (Chlorobium tepidum)	B	CT	473	CT2084	NP_662959.1;WP_010933739.1;		thdF trmE
Q8KA85	Q8KA85	MNMG_CHLTE	tRNA uridine 5-carboxymethylaminomethyl modification enzyme MnmG (Glucose-inhibited division protein A)	MnmG	mnmG gidA CT2283	Chlorobaculum tepidum (strain ATCC 49652 / DSM 12025 / NBRC 103806 / TLS) (Chlorobium tepidum)	B	CT	621	CT2283	NP_663154.1;WP_010933931.1;		gidA
Q54JH6	Q54JH6	CMT1_DICDI	DNA (cytosine-5)-methyltransferase (EC 2.1.1.37)	DnmA	dnmA DDB_G0288047	Dictyostelium discoideum (Social amoeba)	E	DD	379		XP_636955.1;	DDB_G0288047
P76290	P76290	CMOA_ECOLI	Carboxy-S-adenosyl-L-methionine synthase (Cx-SAM synthase) (EC 2.1.3.-)	CmoA	cmoA yecO b1870 JW1859	Escherichia coli (strain K12)	B	EC	247	b1870 JW1859	NP_416384.1;WP_000019590.1;		yecO
P76291	P76291	CMOB_ECOLI	tRNA U34 carboxymethyltransferase (EC 2.5.1.-)	CmoB	cmoB yecP b1871 JW1860	Escherichia coli (strain K12)	B	EC	323	b1871 JW1860	NP_416385.1;WP_000564725.1;		yecP
P32695	P32695	DUSA_ECOLI	tRNA-dihydrouridine(20/20a) synthase (EC 1.3.1.-) (EC 1.3.1.91) (U20-specific dihydrouridine synthase) (U20-specific Dus) (tRNA-dihydrouridine synthase A)	DusA	dusA yjbN b4049 JW5950	Escherichia coli (strain K12)	B	EC	345	b4049 JW5950	NP_418473.3;WP_001298868.1;		yjbN
P0ABT5	P0ABT5	DUSB_ECOLI	tRNA-dihydrouridine synthase B (EC 1.3.1.-)	DusB	dusB yhdG b3260 JW3228	Escherichia coli (strain K12)	B	EC	321	b3260 JW3228	NP_417726.1;WP_001219652.1;		yhdG
P33371	P33371	DUSC_ECOLI	tRNA-dihydrouridine(16) synthase (EC 1.3.1.-) (U16-specific dihydrouridine synthase) (U16-specific Dus) (tRNA-dihydrouridine synthase C)	DusC	dusC yohI b2140 JW2128	Escherichia coli (strain K12)	B	EC	315	b2140 JW2128	NP_416645.1;WP_001264861.1;		yohI
P27305	P27305	GLUQ_ECOLI	Glutamyl-Q tRNA(Asp) synthetase (Glu-Q-RSs) (EC 6.1.1.-)	GluQRS	gluQ yadB b0144 JW5892	Escherichia coli (strain K12)	B	EC	308	b0144 JW5892	NP_414686.3;WP_000937424.1;		yadB
P16384	P16384	MIAA_ECOLI	tRNA dimethylallyltransferase (EC 2.5.1.75) (Dimethylallyl diphosphate:tRNA dimethylallyltransferase) (DMAPP:tRNA dimethylallyltransferase) (DMATase) (Isopentenyl-diphosphate:tRNA isopentenyltransferase) (IPP transferase) (IPPT) (IPTase)	MiaA	miaA trpX b4171 JW4129	Escherichia coli (strain K12)	B	EC	316	b4171 JW4129	NP_418592.1;WP_001280345.1;		trpX
P0AEI1	P0AEI1	MIAB_ECOLI	tRNA-2-methylthio-N(6)-dimethylallyladenosine synthase (EC 2.8.4.3) ((Dimethylallyl)adenosine tRNA methylthiotransferase MiaB) (tRNA-i(6)A37 methylthiotransferase)	MiaB	miaB yleA b0661 JW0658	Escherichia coli (strain K12)	B	EC	474	b0661 JW0658	NP_415194.1;WP_000162740.1;		yleA
P25745	P25745	MNMA_ECOLI	tRNA-specific 2-thiouridylase MnmA (EC 2.8.1.13)	MnmA	mnmA asuE trmU ycfB b1133 JW1119	Escherichia coli (strain K12)	B	EC	368	b1133 JW1119	NP_415651.4;WP_001297484.1;		asuE trmU ycfB
P77182	P77182	MNMC_ECOLI	tRNA 5-methylaminomethyl-2-thiouridine biosynthesis bifunctional protein MnmC (tRNA mnm(5)s(2)U biosynthesis bifunctional protein) [Includes: tRNA (mnm(5)s(2)U34)-methyltransferase (EC 2.1.1.61); FAD-dependent cmnm(5)s(2)U34 oxidoreductase (EC 1.5.-.-)]	MnmCD	mnmC yfcK b2324 JW5380	Escherichia coli (strain K12)	B	EC	668	b2324 JW5380	NP_416827.4;WP_000683799.1;		yfcK
P25522	P25522	MNME_ECOLI	tRNA modification GTPase MnmE (EC 3.6.-.-)	MnmE	mnmE thdF trmE b3706 JW3684	Escherichia coli (strain K12)	B	EC	454	b3706 JW3684	NP_418162.1;WP_001282346.1;		thdF trmE
P0A6U3	P0A6U3	MNMG_ECOLI	tRNA uridine 5-carboxymethylaminomethyl modification enzyme MnmG (Glucose-inhibited division protein A)	MnmG	mnmG gidA trmF b3741 JW3719	Escherichia coli (strain K12)	B	EC	629	b3741 JW3719	NP_418197.1;WP_000499788.1;		gidA trmF
P33667	P33667	SELU_ECOLI	tRNA 2-selenouridine synthase (EC 2.9.1.3) (Selenophosphate-dependent tRNA 2-selenouridine synthase)	MnmH	selU ybbB b0503 JW0491	Escherichia coli (strain K12)	B	EC	364	b0503 JW0491	NP_415036.1;WP_001157938.1;		ybbB
P0A7F9	P0A7F9	QUEA_ECOLI	S-adenosylmethionine:tRNA ribosyltransferase-isomerase (EC 2.4.99.17) (Queuosine biosynthesis protein QueA)	QueA	queA b0405 JW0395	Escherichia coli (strain K12)	B	EC	356	b0405 JW0395	NP_414939.1;WP_001266503.1;
Q46920	Q46920	QUEF_ECOLI	NADPH-dependent 7-cyano-7-deazaguanine reductase (EC 1.7.1.13) (7-cyano-7-carbaguanine reductase) (NADPH-dependent nitrile oxidoreductase) (PreQ(0) reductase)	QueF	queF yqcD b2794 JW2765	Escherichia coli (strain K12)	B	EC	282	b2794 JW2765	NP_417274.1;WP_000100421.1;		yqcD
P39288	P39288	QUEG_ECOLI	Epoxyqueuosine reductase (EC 1.17.99.6) (Queuosine biosynthesis protein QueG)	QueG	queG yjeS b4166 JW4124	Escherichia coli (strain K12)	B	EC	379	b4166 JW4124	NP_418587.1;WP_001294219.1;		yjeS
P68398	P68398	TADA_ECOLI	tRNA-specific adenosine deaminase (EC 3.5.4.33)	TadA	tadA yfhC b2559 JW2543	Escherichia coli (strain K12)	B	EC	167	b2559 JW2543	NP_417054.2;WP_001297409.1;		yfhC
Q46927	Q46927	TCDA_ECOLI	tRNA threonylcarbamoyladenosine dehydratase (EC 6.1.-.-) (t(6)A37 dehydratase)	TcdA	tcdA csdL ygdL b2812 JW2783	Escherichia coli (strain K12)	B	EC	268	b2812 JW2783	NP_417292.1;WP_000117728.1;		csdL ygdL
P0A847	P0A847	TGT_ECOLI	Queuine tRNA-ribosyltransferase (EC 2.4.2.29) (Guanine insertion enzyme) (tRNA-guanine transglycosylase)	Tgt	tgt b0406 JW0396	Escherichia coli (strain K12)	B	EC	375	b0406 JW0396	NP_414940.1;WP_000667319.1;
P77718	P77718	THII_ECOLI	tRNA sulfurtransferase (EC 2.8.1.4) (Sulfur carrier protein ThiS sulfurtransferase) (Thiamine biosynthesis protein ThiI) (tRNA 4-thiouridine synthase)	ThiI	thiI yajK b0423 JW0413	Escherichia coli (strain K12)	B	EC	482	b0423 JW0413	NP_414957.1;WP_000668662.1;		yajK
P52097	P52097	TILS_ECOLI	tRNA(Ile)-lysidine synthase (EC 6.3.4.19) (tRNA(Ile)-2-lysyl-cytidine synthase) (tRNA(Ile)-lysidine synthetase)	TilS	tilS mesJ yaeN b0188 JW0183	Escherichia coli (strain K12)	B	EC	432	b0188 JW0183	NP_414730.1;WP_000176549.1;		mesJ yaeN
P76562	P76562	TMCA_ECOLI	tRNA(Met) cytidine acetyltransferase TmcA (EC 2.3.1.193) (Lysine 2-hydroxyisobutyryltransferase) (EC 2.3.1.-)	TmcA	tmcA ypfI b2474 JW2459	Escherichia coli (strain K12)	B	EC	671	b2474 JW2459	NP_416969.1;WP_000829360.1;		ypfI
P23003	P23003	TRMA_ECOLI	tRNA/tmRNA (uracil-C(5))-methyltransferase (EC 2.1.1.-) (EC 2.1.1.35) (tRNA (uracil(54)-C(5))-methyltransferase) (tRNA(m5U54)-methyltransferase) (RUMT) (tmRNA (uracil(341)-C(5))-methyltransferase)	TrmA	trmA b3965 JW3937	Escherichia coli (strain K12)	B	EC	366	b3965 JW3937	NP_418400.1;WP_000187022.1;
P0A8I5	P0A8I5	TRMB_ECOLI	tRNA (guanine-N(7)-)-methyltransferase (EC 2.1.1.33) (tRNA (guanine(46)-N(7))-methyltransferase) (tRNA(m7G46)-methyltransferase)	TrmB	trmB trmI yggH b2960 JW2927	Escherichia coli (strain K12)	B	EC	239	b2960 JW2927	NP_417435.1;WP_000786911.1;		trmI yggH
P0A873	P0A873	TRMD_ECOLI	tRNA (guanine-N(1)-)-methyltransferase (EC 2.1.1.228) (M1G-methyltransferase) (tRNA [GM37] methyltransferase)	TrmD	trmD b2607 JW2588	Escherichia coli (strain K12)	B	EC	255	b2607 JW2588	NP_417098.1;WP_000264777.1;
P0AGJ2	P0AGJ2	TRMH_ECOLI	tRNA (guanosine(18)-2'-O)-methyltransferase (EC 2.1.1.34) (tRNA [Gm18] methyltransferase)	TrmH	trmH spoU b3651 JW3626	Escherichia coli (strain K12)	B	EC	229	b3651 JW3626	NP_418108.1;WP_001070177.1;		spoU
P0AE01	P0AE01	TRMJ_ECOLI	tRNA (cytidine/uridine-2'-O-)-methyltransferase TrmJ (EC 2.1.1.200) (TrMet(Xm32)) (tRNA (cytidine(32)/uridine(32)-2'-O)-methyltransferase) (tRNA Cm32/Um32 methyltransferase)	TrmJ	trmJ yfhQ b2532 JW2516	Escherichia coli (strain K12)	B	EC	246	b2532 JW2516	NP_417027.1;WP_000940019.1;		yfhQ
P0AGJ7	P0AGJ7	TRML_ECOLI	tRNA (cytidine(34)-2'-O)-methyltransferase (EC 2.1.1.207) (tRNA (cytidine/uridine-2'-O-)-methyltransferase TrmL)	TrmL	trmL yibK b3606 JW3581	Escherichia coli (strain K12)	B	EC	157	b3606 JW3581	NP_418063.1;WP_000932347.1;		yibK
P31825	P31825	TRMN6_ECOLI	tRNA1(Val) (adenine(37)-N6)-methyltransferase (EC 2.1.1.223) (tRNA m6A37 methyltransferase)	TrmM	yfiC b2575 JW2559	Escherichia coli (strain K12)	B	EC	245	b2575 JW2559	NP_417070.2;WP_001295363.1;
P28634	P28634	TRMO_ECOLI	tRNA (adenine(37)-N6)-methyltransferase (EC 2.1.1.-) (tRNA (m6t6A37) methyltransferase) (tRNA methyltransferase O)	TrmO	trmO tsaA yaeB b0195 JW0191	Escherichia coli (strain K12)	B	EC	235	b0195 JW0191	NP_414737.1;WP_000094011.1;		tsaA yaeB
P07649	P07649	TRUA_ECOLI	tRNA pseudouridine synthase A (EC 5.4.99.12) (tRNA pseudouridine(38-40) synthase) (tRNA pseudouridylate synthase I) (PSU-I) (tRNA-uridine isomerase I)	TruA	truA asuC hisT leuK b2318 JW2315	Escherichia coli (strain K12)	B	EC	270	b2318 JW2315	NP_416821.1;WP_001283586.1;		asuC hisT leuK
P60340	P60340	TRUB_ECOLI	tRNA pseudouridine synthase B (EC 5.4.99.25) (Protein P35) (tRNA pseudouridine(55) synthase) (Psi55 synthase) (tRNA pseudouridylate synthase) (tRNA-uridine isomerase)	TruB	truB yhbA b3166 JW3135	Escherichia coli (strain K12)	B	EC	314	b3166 JW3135	NP_417635.1;WP_000089698.1;		yhbA
P0AA41	P0AA41	TRUC_ECOLI	tRNA pseudouridine synthase C (EC 5.4.99.26) (tRNA pseudouridine(65) synthase) (tRNA pseudouridylate synthase C) (tRNA-uridine isomerase C)	TruC	truC yqcB b2791 JW2762	Escherichia coli (strain K12)	B	EC	260	b2791 JW2762	NP_417271.1;WP_000890001.1;		yqcB
Q57261	Q57261	TRUD_ECOLI	tRNA pseudouridine synthase D (EC 5.4.99.27) (tRNA pseudouridine(13) synthase) (tRNA pseudouridylate synthase D) (tRNA-uridine isomerase D)	TruD	truD ygbO b2745 JW2715	Escherichia coli (strain K12)	B	EC	349	b2745 JW2715	NP_417225.1;WP_000568943.1;		ygbO
P76256	P76256	TSAB_ECOLI	tRNA threonylcarbamoyladenosine biosynthesis protein TsaB (t(6)A37 threonylcarbamoyladenosine biosynthesis protein TsaB)	TsaB	tsaB yeaZ b1807 JW1796	Escherichia coli (strain K12)	B	EC	231	b1807 JW1796	NP_416321.1;WP_001220966.1;		yeaZ
P45748	P45748	TSAC_ECOLI	Threonylcarbamoyl-AMP synthase (TC-AMP synthase) (EC 2.7.7.87) (L-threonylcarbamoyladenylate synthase) (Ribosome maturation factor TsaC) (t(6)A37 threonylcarbamoyladenosine biosynthesis protein TsaC) (tRNA threonylcarbamoyladenosine biosynthesis protein TsaC)	TsaC	tsaC rimN yrdC b3282 JW3243	Escherichia coli (strain K12)	B	EC	190	b3282 JW3243	NP_417741.1;WP_001301412.1;		rimN yrdC
P05852	P05852	TSAD_ECOLI	tRNA N6-adenosine threonylcarbamoyltransferase (EC 2.3.1.234) (N6-L-threonylcarbamoyladenine synthase) (t(6)A synthase) (t(6)A37 threonylcarbamoyladenosine biosynthesis protein TsaD) (tRNA threonylcarbamoyladenosine biosynthesis protein TsaD)	TsaD	tsaD gcp ygjD b3064 JW3036	Escherichia coli (strain K12)	B	EC	337	b3064 JW3036	NP_417536.1;WP_001264352.1;		gcp ygjD
P0AF67	P0AF67	TSAE_ECOLI	tRNA threonylcarbamoyladenosine biosynthesis protein TsaE (t(6)A37 threonylcarbamoyladenosine biosynthesis protein TsaE)	TsaE	tsaE yjeE b4168 JW4126	Escherichia coli (strain K12)	B	EC	153	b4168 JW4126	NP_418589.1;WP_000981977.1;		yjeE
P76055	P76055	TTCA_ECOLI	tRNA-cytidine(32) 2-sulfurtransferase (EC 2.8.1.-) (Two-thiocytidine biosynthesis protein A) (tRNA 2-thiocytidine biosynthesis protein TtcA)	TtcA	ttcA ydaO b1344 JW1338	Escherichia coli (strain K12)	B	EC	311	b1344 JW1338	NP_415860.1;WP_001157406.1;		ydaO
P0A890	P0A890	TUSA_ECOLI	Sulfur carrier protein TusA (Sulfur mediator TusA) (Sulfur transfer protein TusA) (tRNA 2-thiouridine synthesizing protein A)	TusA	tusA sirA yhhP b3470 JW3435	Escherichia coli (strain K12)	B	EC	81	b3470 JW3435	NP_417927.1;WP_000130621.1;		sirA yhhP
P45530	P45530	TUSB_ECOLI	Protein TusB (tRNA 2-thiouridine synthesizing protein B)	TusB	tusB yheL b3343 JW3305	Escherichia coli (strain K12)	B	EC	95	b3343 JW3305	NP_417802.1;WP_000903373.1;		yheL
P45531	P45531	TUSC_ECOLI	Protein TusC (tRNA 2-thiouridine synthesizing protein C)	TusC	tusC yheM b3344 JW3306	Escherichia coli (strain K12)	B	EC	119	b3344 JW3306	NP_417803.1;WP_000820714.1;		yheM
P45532	P45532	TUSD_ECOLI	Sulfurtransferase TusD (EC 2.8.1.-) (tRNA 2-thiouridine synthesizing protein D)	TusD	tusD yheN b3345 JW3307	Escherichia coli (strain K12)	B	EC	128	b3345 JW3307	NP_417804.1;WP_001209680.1;		yheN
P0AB18	P0AB18	TUSE_ECOLI	Sulfurtransferase TusE (EC 2.8.1.-) (tRNA 2-thiouridine synthesizing protein E)	TusE	tusE yccK b0969 JW0952	Escherichia coli (strain K12)	B	EC	109	b0969 JW0952	NP_415489.4;WP_000904442.1;		yccK
Q47319	Q47319	TAPT_ECOLI	tRNA-uridine aminocarboxypropyltransferase (EC 2.5.1.25) (SAM-dependent 3-amino-3-carboxypropyl transferase) (tRNA U47 acp transferase A) (tRNA aminocarboxypropyltransferase)	TapT	tapT tuaA yfiP b2583 JW5409	Escherichia coli (strain K12)	B	EC	232	b2583 JW5409	NP_417078.4;WP_001300438.1;		tuaA yfiP
P24188	P24188	TRHO_ECOLI	tRNA uridine(34) hydroxylase (EC 1.14.-.-) (ORF39.9) (tRNA hydroxylation protein O)	TrhO	trhO yceA b1055 JW1042	Escherichia coli (strain K12)	B	EC	350	b1055 JW1042	NP_415573.1;WP_001144615.1;		yceA
P76403	P76403	TRHP_ECOLI	tRNA hydroxylation protein P (EC 3.4.-.-)	TrhP	trhP yegQ b2081 JW2066	Escherichia coli (strain K12)	B	EC	453	b2081 JW2066	NP_416585.1;WP_000476011.1;		yegQ
P36566	P36566	CMOM_ECOLI	tRNA 5-carboxymethoxyuridine methyltransferase (EC 2.1.1.-) (cmo5U methyltransferase)	CmoM	cmoM smtA ycbD b0921 JW0904	Escherichia coli (strain K12)	B	EC	261	b0921 JW0904	NP_415441.1;WP_001298300.1;		smtA ycbD
P0AA37	P0AA37	RLUA_ECOLI	Dual-specificity RNA pseudouridine synthase RluA	RluA	yabO b0058 JW0057	Escherichia coli (strain K12)	B	EC	219	b0058 JW0057	NP_414600.1;WP_000525176		rluA
Q5L3T3	Q5L3T3	TILS_GEOKA	tRNA(Ile)-lysidine synthase (EC 6.3.4.19) (tRNA(Ile)-2-lysyl-cytidine synthase) (tRNA(Ile)-lysidine synthetase)	TilS	tilS GK0060	Geobacillus kaustophilus (strain HTA426)	B	GK	464	GK0060	WP_011229575.1;
Q74GL9	Q74GL9	Q74GL9_GEOSL	DNA (cytosine-5-)-methyltransferase (EC 2.1.1.37)	Dnmt2	GSU0227	Geobacter sulfurreducens (strain ATCC 51573 / DSM 12127 / PCA)	B	GS	305		NP_951288.1;WP_010940902.1;	GSU0227
P43985	P43985	CMOA_HAEIN	Carboxy-S-adenosyl-L-methionine synthase (Cx-SAM synthase) (EC 2.1.3.-)	CmoA	cmoA HI_0319	Haemophilus influenzae (strain ATCC 51907 / DSM 11121 / KW20 / Rd)	B	HI	241	HI_0319	NP_438485.1;WP_005694346.1;
Q9C4M3	Q9C4M3	ATGT_HALVD	tRNA-guanine(15) transglycosylase (EC 2.4.2.48) (7-cyano-7-deazaguanine tRNA-ribosyltransferase) (Archaeal tRNA-guanine transglycosylase)	TgtA	tgtA tgt HVO_2001	Haloferax volcanii (strain ATCC 29605 / DSM 3757 / JCM 8879 / NBRC 14742 / NCIMB 2012 / VKM B-1768 / DS2) (Halobacterium volcanii)	A	HV	516	HVO_2001	WP_004041882.1;		tgt
D4GTL8	D4GTL8	TRMY_HALVD	tRNA (pseudouridine(54)-N(1))-methyltransferase (EC 2.1.1.257)	TrmY	trmY HVO_1989	Haloferax volcanii (strain ATCC 29605 / DSM 3757 / JCM 8879 / NBRC 14742 / NCIMB 2012 / VKM B-1768 / DS2) (Halobacterium volcanii)	A	HV	198	HVO_1989	WP_004041871.1;
Q7Z6V5	Q7Z6V5	ADAT2_HUMAN	tRNA-specific adenosine deaminase 2 (EC 3.5.4.33) (Deaminase domain-containing protein 1) (tRNA-specific adenosine-34 deaminase subunit ADAT2)	ADAT2	ADAT2 DEADC1	Homo sapiens (Human)	E	HS	191		NP_001273188.1 [Q7Z6V5-2];NP_872309.2 [Q7Z6V5-1];XP_011533742.1;XP_011533746.1 [Q7Z6V5-2];XP_016865749.1 [Q7Z6V5-2];XP_016865750.1;XP_016865751.1 [Q7Z6V5-2];		DEADC1
Q96EY9	Q96EY9	ADAT3_HUMAN	Probable inactive tRNA-specific adenosine deaminase-like protein 3 (tRNA-specific adenosine-34 deaminase subunit ADAT3)	ADAT3	ADAT3 TAD3	Homo sapiens (Human)	E	HS	351		NP_001316462.1;NP_612431.2;		TAD3
Q96BT7	Q96BT7	ALKB8_HUMAN	Alkylated DNA repair protein alkB homolog 8 (Probable alpha-ketoglutarate-dependent dioxygenase ABH8) (S-adenosyl-L-methionine-dependent tRNA methyltransferase ABH8) (tRNA (carboxymethyluridine(34)-5-O)-methyltransferase ABH8) (EC 2.1.1.229)	ALKBH8	ALKBH8 ABH8	Homo sapiens (Human)	E	HS	664		NP_001287939.1 [Q96BT7-1];NP_620130.2 [Q96BT7-1];		ABH8
Q5VV42	Q5VV42	CDKAL_HUMAN	Threonylcarbamoyladenosine tRNA methylthiotransferase (EC 2.8.4.5) (CDK5 regulatory subunit-associated protein 1-like 1) (tRNA-t(6)A37 methylthiotransferase)	CDKAL1	CDKAL1	Homo sapiens (Human)	E	HS	579		NP_060244.2 [Q5VV42-1];
Q7Z7A3	Q7Z7A3	CTU1_HUMAN	Cytoplasmic tRNA 2-thiolation protein 1 (EC 2.7.7.-) (ATP-binding domain-containing protein 3) (Cancer-associated gene protein) (Cytoplasmic tRNA adenylyltransferase 1)	CTU1	CTU1 ATPBD3 NCS6	Homo sapiens (Human)	E	HS	348		NP_660275.2;		ATPBD3 NCS6
O14717	O14717	TRDMT_HUMAN	tRNA (cytosine(38)-C(5))-methyltransferase (EC 2.1.1.204) (DNA (cytosine-5)-methyltransferase-like protein 2) (Dnmt2) (DNA methyltransferase homolog HsaIIP) (DNA MTase homolog HsaIIP) (M.HsaIIP) (PuMet)	Dnmt2	TRDMT1 DNMT2	Homo sapiens (Human)	E	HS	391		NP_001307935.1;NP_001307936.1;NP_004403.1 [O14717-1];XP_005252432.1 [O14717-3];		DNMT2
Q9NX74	Q9NX74	DUS2L_HUMAN	tRNA-dihydrouridine(20) synthase [NAD(P)+]-like (EC 1.3.1.91) (Dihydrouridine synthase 2) (Up-regulated in lung cancer protein 8) (URLC8) (tRNA-dihydrouridine synthase 2-like) (hDUS2)	Dus2	DUS2 DUS2L	Homo sapiens (Human)	E	HS	493		NP_001258691.1;NP_001258692.1;NP_060273.1;		DUS2L
O95163	O95163	ELP1_HUMAN	Elongator complex protein 1 (ELP1) (IkappaB kinase complex-associated protein) (IKK complex-associated protein) (p150)	ELP1	ELP1 IKAP IKBKAP	Homo sapiens (Human)	E	HS	1332		NP_001305289.1;NP_003631.2;		IKAP IKBKAP
Q9H9T3	Q9H9T3	ELP3_HUMAN	Elongator complex protein 3 (hELP3) (EC 2.3.1.-) (tRNA uridine(34) acetyltransferase)	ELP3	ELP3	Homo sapiens (Human)	E	HS	547		NP_001271151.1 [Q9H9T3-2];NP_001271153.1 [Q9H9T3-4];NP_001271154.1 [Q9H9T3-4];NP_001271155.1 [Q9H9T3-5];NP_060561.3 [Q9H9T3-1];XP_006716417.1 [Q9H9T3-4];
Q9UET6	Q9UET6	TRM7_HUMAN	Putative tRNA (cytidine(32)/guanosine(34)-2'-O)-methyltransferase (EC 2.1.1.205) (2'-O-ribose RNA methyltransferase TRM7 homolog) (Protein ftsJ homolog 1)	FTSJ1	FTSJ1 JM23	Homo sapiens (Human)	E	HS	329		NP_001269086.1;NP_036412.1 [Q9UET6-1];NP_803188.1 [Q9UET6-2];XP_005272652.1 [Q9UET6-2];	JM23
Q9BXV9	Q9BXV9	GON7_HUMAN	EKC/KEOPS complex subunit GON7	GON7	GON7 C14orf142	Homo sapiens (Human)	E	HS	100		NP_115879.2;	C14orf142
Q9UBP6	Q9UBP6	TRMB_HUMAN	tRNA (guanine-N(7)-)-methyltransferase (EC 2.1.1.33) (Methyltransferase-like protein 1) (mRNA (guanine-N(7)-)-methyltransferase) (EC 2.1.1.-) (miRNA (guanine-N(7)-)-methyltransferase) (EC 2.1.1.-) (tRNA (guanine(46)-N(7))-methyltransferase) (tRNA(m7G46)-methyltransferase)	METTL1	METTL1 C12orf1	Homo sapiens (Human)	E	HS	276		NP_005362.3 [Q9UBP6-1];NP_075422.3 [Q9UBP6-2];		C12orf1
Q6P1Q9	Q6P1Q9	MET2B_HUMAN	tRNA N(3)-methylcytidine methyltransferase METTL2B (EC 2.1.1.-) (Methyltransferase-like protein 2B)	METTL2B	METTL2B	Homo sapiens (Human)	E	HS	378		NP_060866.2 [Q6P1Q9-1];
Q9H825	Q9H825	METL8_HUMAN	tRNA N(3)-methylcytidine methyltransferase METTL8, mitochondrial (EC 2.1.1.-) (Methyltransferase-like protein 8) (mRNA N(3)-methylcytidine methyltransferase METTL8) (EC 2.1.1.-)	METTL8	METTL8	Homo sapiens (Human)	E	HS	291		NP_001308083.1;NP_001308084.1;NP_001308085.1;NP_001308086.1;NP_001308088.1;NP_001308089.1 [Q9H825-1];NP_001308091.1 [Q9H825-2];
Q9H3H1	Q9H3H1	MOD5_HUMAN	tRNA dimethylallyltransferase (EC 2.5.1.75) (Isopentenyl-diphosphate:tRNA isopentenyltransferase) (IPP transferase) (IPPT) (hGRO1) (tRNA isopentenyltransferase 1) (IPTase)	Mod5	TRIT1 IPT MOD5	Homo sapiens (Human)	E	HS	467		NP_001299620.1 [Q9H3H1-4];NP_001299621.1 [Q9H3H1-5];NP_060116.2 [Q9H3H1-1];XP_006710769.1 [Q9H3H1-2];		IPT MOD5
Q9Y606	Q9Y606	PUS1_HUMAN	Pseudouridylate synthase 1 homolog (EC 5.4.99.-) (tRNA pseudouridine synthase 1) (EC 5.4.99.12) (tRNA pseudouridine(38-40) synthase) (tRNA pseudouridylate synthase I) (tRNA-uridine isomerase I)	Pus1	PUS1 PP8985	Homo sapiens (Human)	E	HS	427		NP_001002019.1 [Q9Y606-2];NP_001002020.1 [Q9Y606-2];NP_079491.2 [Q9Y606-1];	PP8985
Q9H974	Q9H974	QTRT2_HUMAN	Queuine tRNA-ribosyltransferase accessory subunit 2 (Queuine tRNA-ribosyltransferase domain-containing protein 1)	QTRT2	QTRT2 QTRTD1	Homo sapiens (Human)	E	HS	415		NP_001243764.1 [Q9H974-4];NP_001243765.1 [Q9H974-3];NP_001243766.1 [Q9H974-2];NP_078914.1 [Q9H974-1];XP_005247827.1 [Q9H974-2];XP_016862671.1 [Q9H974-2];XP_016862672.1 [Q9H974-2];		QTRTD1
Q9BUB4	Q9BUB4	ADAT1_HUMAN	tRNA-specific adenosine deaminase 1 (hADAT1) (EC 3.5.4.34) (tRNA-specific adenosine-37 deaminase)	Tad1	ADAT1	Homo sapiens (Human)	E	HS	502		NP_001311373.1 [Q9BUB4-2];NP_001311374.1 [Q9BUB4-1];NP_001311375.1 [Q9BUB4-2];NP_036223.2 [Q9BUB4-1];
Q9NWX6	Q9NWX6	THG1_HUMAN	Probable tRNA(His) guanylyltransferase (EC 2.7.7.79) (Induced in high glucose-1) (IHG-1) (Interphase cytoplasmic foci protein 45) (tRNA-histidine guanylyltransferase)	THG1L	THG1L ICF45	Homo sapiens (Human)	E	HS	298		NP_001304753.1;NP_001304754.1;NP_001304755.1;NP_060342.2;		ICF45
Q9NXH9	Q9NXH9	TRM1_HUMAN	tRNA (guanine(26)-N(2))-dimethyltransferase (EC 2.1.1.216) (tRNA 2,2-dimethylguanosine-26 methyltransferase) (tRNA(guanine-26,N(2)-N(2)) methyltransferase) (tRNA(m(2,2)G26)dimethyltransferase)	Trm1	TRMT1	Homo sapiens (Human)	E	HS	659		NP_001129507.1 [Q9NXH9-1];NP_001136026.1 [Q9NXH9-2];NP_060192.1 [Q9NXH9-1];XP_016882433.1;XP_016882434.1;
Q9UI30	Q9UI30	TR112_HUMAN	Multifunctional methyltransferase subunit TRM112-like protein (tRNA methyltransferase 112 homolog)	TRM112	TRMT112 AD-001 HSPC152 HSPC170	Homo sapiens (Human)	E	HS	125		NP_001273011.1 [Q9UI30-2];NP_057488.1 [Q9UI30-1];	AD-001 HSPC152 HSPC170
Q32P41	Q32P41	TRM5_HUMAN	tRNA (guanine(37)-N1)-methyltransferase (EC 2.1.1.228) (M1G-methyltransferase) (tRNA [GM37] methyltransferase) (tRNA methyltransferase 5 homolog)	TRM5	TRMT5 KIAA1393 TRM5	Homo sapiens (Human)	E	HS	509		NP_065861.3;		KIAA1393 TRM5
Q9BU70	Q9BU70	TRMO_HUMAN	tRNA (adenine(37)-N6)-methyltransferase (EC 2.1.1.-) (tRNA methyltransferase O)	TRMO	TRMO C9orf156 HSPC219	Homo sapiens (Human)	E	HS	441		NP_001317654.1;NP_057565.3;	HSPC219	C9orf156
Q8TBZ6	Q8TBZ6	TM10A_HUMAN	tRNA methyltransferase 10 homolog A (EC 2.1.1.221) (RNA (guanine-9-)-methyltransferase domain-containing protein 2) (tRNA (guanine(9)-N(1))-methyltransferase TRMT10A)	TRMT10A	TRMT10A RG9MTD2	Homo sapiens (Human)	E	HS	339		NP_001128137.1;NP_001128138.1;NP_689505.1;XP_005263409.1;XP_006714480.1;		RG9MTD2
Q6PF06	Q6PF06	TM10B_HUMAN	tRNA methyltransferase 10 homolog B (EC 2.1.1.221) (RNA (guanine-9-)-methyltransferase domain-containing protein 3) (tRNA (guanine(9)-N(1))-methyltransferase TRMT10B)	TRMT10B	TRMT10B RG9MTD3	Homo sapiens (Human)	E	HS	316		NP_001273879.1 [Q6PF06-5];NP_001273880.1 [Q6PF06-2];NP_001273881.1 [Q6PF06-4];NP_001273882.1;NP_001273883.1;NP_659401.2 [Q6PF06-1];		RG9MTD3
Q7L0Y3	Q7L0Y3	TM10C_HUMAN	tRNA methyltransferase 10 homolog C (HBV pre-S2 trans-regulated protein 2) (Mitochondrial ribonuclease P protein 1) (Mitochondrial RNase P protein 1) (RNA (guanine-9-)-methyltransferase domain-containing protein 1) (Renal carcinoma antigen NY-REN-49) (mRNA methyladenosine-N(1)-methyltransferase) (EC 2.1.1.-) (tRNA (adenine(9)-N(1))-methyltransferase) (EC 2.1.1.218) (tRNA (guanine(9)-N(1))-methylt…	TRMT10C	TRMT10C MRPP1 RG9MTD1	Homo sapiens (Human)	E	HS	403		NP_060289.2;		MRPP1 RG9MTD1
Q8IZ69	Q8IZ69	TRM2A_HUMAN	tRNA (uracil-5-)-methyltransferase homolog A (EC 2.1.1.35) (mRNA (uracil-5-)-methyltransferase TRMT2A) (EC 2.1.1.-)	TRMT2A	TRMT2A	Homo sapiens (Human)	E	HS	625		NP_001244923.1 [Q8IZ69-2];NP_073564.3 [Q8IZ69-1];NP_892029.2 [Q8IZ69-1];
Q96GJ1	Q96GJ1	TRM2B_HUMAN	tRNA (uracil-5-)-methyltransferase homolog B (EC 2.1.1.35) (TRM2 homolog B) (rRNA (uracil-5-)-methyltransferase TRMT2B) (EC 2.1.1.-)	TRMT2B	TRMT2B CXorf34	Homo sapiens (Human)	E	HS	504		NP_001161442.1 [Q96GJ1-1];NP_001161443.1 [Q96GJ1-3];NP_001161444.1 [Q96GJ1-1];NP_079193.2 [Q96GJ1-1];XP_005262252.1 [Q96GJ1-1];XP_005262253.1 [Q96GJ1-1];XP_006724768.1 [Q96GJ1-1];XP_016885351.1 [Q96GJ1-3];		CXorf34
Q9UJA5	Q9UJA5	TRM6_HUMAN	tRNA (adenine(58)-N(1))-methyltransferase non-catalytic subunit TRM6 (mRNA methyladenosine-N(1)-methyltransferase non-catalytic subunit TRM6) (tRNA(m1A58)-methyltransferase subunit TRM6) (tRNA(m1A58)MTase subunit TRM6)	Trmt6	TRMT6 KIAA1153 TRM6 CGI-09	Homo sapiens (Human)	E	HS	497		NP_001268396.1 [Q9UJA5-4];NP_057023.2 [Q9UJA5-1];	CGI-09	KIAA1153 TRM6
Q96FX7	Q96FX7	TRM61_HUMAN	tRNA (adenine(58)-N(1))-methyltransferase catalytic subunit TRMT61A (EC 2.1.1.220) (mRNA methyladenosine-N(1)-methyltransferase catalytic subunit TRMT61A) (EC 2.1.1.-) (tRNA(m1A58)-methyltransferase subunit TRMT61A) (tRNA(m1A58)MTase subunit TRMT61A)	Trmt61A	TRMT61A C14orf172 TRM61	Homo sapiens (Human)	E	HS	289		NP_689520.2;		C14orf172 TRM61
Q9BVS5	Q9BVS5	TR61B_HUMAN	tRNA (adenine(58)-N(1))-methyltransferase, mitochondrial (EC 2.1.1.220) (mRNA methyladenosine-N(1)-methyltransferase) (EC 2.1.1.-)	Trmt61B	TRMT61B	Homo sapiens (Human)	E	HS	477		NP_060380.3;
O75648	O75648	MTU1_HUMAN	Mitochondrial tRNA-specific 2-thiouridylase 1 (EC 2.8.1.14) (MTO2 homolog)	TrmU	TRMU MTU1 TRMT1	Homo sapiens (Human)	E	HS	421		NP_001269712.1;NP_001269713.1;NP_001269714.1 [O75648-2];NP_060476.2 [O75648-1];		MTU1 TRMT1
Q8WWH5	Q8WWH5	TRUB1_HUMAN	Pseudouridylate synthase TRUB1 (EC 5.4.99.-) (TruB pseudouridine synthase homolog 1) (tRNA pseudouridine 55 synthase TRUB1) (Psi55 synthase TRUB1) (EC 5.4.99.25)	TRUB1	TRUB1 PUS4	Homo sapiens (Human)	E	HS	349		NP_631908.1;		PUS4
O95900	O95900	TRUB2_HUMAN	Pseudouridylate synthase TRUB2, mitochondrial (EC 5.4.99.-) (TruB pseudouridine synthase homolog 2) (tRNA pseudouridine 55 synthase TRUB2) (Psi55 synthase TRUB2) (EC 5.4.99.25)	TRUB2	TRUB2	Homo sapiens (Human)	E	HS	331		NP_001316790.1;NP_001316791.1 [O95900-2];NP_001316792.1;NP_056494.1 [O95900-1];
Q53H54	Q53H54	TYW2_HUMAN	tRNA wybutosine-synthesizing protein 2 homolog (tRNA-yW-synthesizing protein 2) (EC 2.5.1.114) (tRNA(Phe) (4-demethylwyosine(37)-C(7)) aminocarboxypropyltransferase)	TYW2	TRMT12 TRM12 TYW2	Homo sapiens (Human)	E	HS	448		NP_060426.2;		TRM12 TYW2
A2RUC4	A2RUC4	TYW5_HUMAN	tRNA wybutosine-synthesizing protein 5 (hTYW5) (tRNA yW-synthesizing protein 5) (EC 1.14.11.42) (tRNA(Phe) (7-(3-amino-3-carboxypropyl)wyosine(37)-C(2))-hydroxylase)	TYW5	TYW5 C2orf60	Homo sapiens (Human)	E	HS	315		NP_001034782.1 [A2RUC4-1];		C2orf60
P57081	P57081	WDR4_HUMAN	tRNA (guanine-N(7)-)-methyltransferase non-catalytic subunit WDR4 (Protein Wuho homolog) (hWH) (WD repeat-containing protein 4)	WDR4	WDR4	Homo sapiens (Human)	E	HS	412		NP_001247403.1 [P57081-2];NP_001247404.1 [P57081-3];NP_001247405.1 [P57081-3];NP_001247406.1 [P57081-3];NP_061139.2 [P57081-1];NP_387510.1 [P57081-1];
Q8N5C7	Q8N5C7	DTWD1_HUMAN	tRNA-uridine aminocarboxypropyltransferase 1 (EC 2.5.1.25) (DTW domain-containing protein 1)	DTWD1	DTWD1 MDS009	Homo sapiens (Human)	E	HS	304		NP_001138427.1 [Q8N5C7-1];NP_064619.2 [Q8N5C7-1];XP_016877908.1 [Q8N5C7-1];XP_016877909.1 [Q8N5C7-1];XP_016877910.1 [Q8N5C7-1];XP_016877911.1 [Q8N5C7-1];XP_016877916.1 [Q8N5C7-2];XP_016877917.1 [Q8N5C7-2];XP_016877918.1 [Q8N5C7-2];XP_016877919.1 [Q8N5C7-2];XP_016877920.1;	MDS009
Q8NBA8	Q8NBA8	DTWD2_HUMAN	tRNA-uridine aminocarboxypropyltransferase 2 (EC 2.5.1.25) (DTW domain-containing protein 2)	DTWD2	DTWD2	Homo sapiens (Human)	E	HS	298		NP_001295010.1 [Q8NBA8-2];NP_775937.1 [Q8NBA8-1];
Q58428	Q58428	ARCS_METJA	Archaeosine synthase (EC 2.6.1.97) (Glutamine:preQ0-tRNA amidinotransferase)	ArcS	arcS MJ1022	Methanocaldococcus jannaschii (strain ATCC 43067 / DSM 2661 / JAL-1 / JCM 10045 / NBRC 100440) (Methanococcus jannaschii)	A	MJ	569	MJ1022
Q57646	Q57646	CG121_METJA	Regulatory protein Cgi121 (Positive regulator of Bud32 kinase activity)	Cgi121	cgi121 MJ0187	Methanocaldococcus jannaschii (strain ATCC 43067 / DSM 2661 / JAL-1 / JCM 10045 / NBRC 100440) (Methanococcus jannaschii)	A	MJ	145	MJ0187	WP_010869682.1;
Q57705	Q57705	TYW1_METJA	S-adenosyl-L-methionine-dependent tRNA 4-demethylwyosine synthase (EC 4.1.3.44) (MjTYW1) (tRNA wyosine derivatives biosynthesis protein Taw1)	Taw1	taw1 MJ0257	Methanocaldococcus jannaschii (strain ATCC 43067 / DSM 2661 / JAL-1 / JCM 10045 / NBRC 100440) (Methanococcus jannaschii)	A	MJ	311	MJ0257	WP_010869754.1;
Q58952	Q58952	TYW2_METJA	tRNA(Phe) (4-demethylwyosine(37)-C(7)) aminocarboxypropyltransferase (EC 2.5.1.114) (MjTYW2) (tRNA wyosine derivatives biosynthesis protein Taw2)	Taw2	taw2 MJ1557	Methanocaldococcus jannaschii (strain ATCC 43067 / DSM 2661 / JAL-1 / JCM 10045 / NBRC 100440) (Methanococcus jannaschii)	A	MJ	249	MJ1557
Q58293	Q58293	TRM5B_METJA	tRNA (guanine(37)-N1)-methyltransferase Trm5b (EC 2.1.1.228) (M1G-methyltransferase) (tRNA [GM37] methyltransferase)	Trm5b	trm5b MJ0883	Methanocaldococcus jannaschii (strain ATCC 43067 / DSM 2661 / JAL-1 / JCM 10045 / NBRC 100440) (Methanococcus jannaschii)	A	MJ	336	MJ0883	WP_010870397.1;
Q57880	Q57880	TRM14_METJA	tRNA (guanine(6)-N2)-methyltransferase (EC 2.1.1.256) (tRNA m2G6-methyltransferase)	TrmN	trm14 MJ0438	Methanocaldococcus jannaschii (strain ATCC 43067 / DSM 2661 / JAL-1 / JCM 10045 / NBRC 100440) (Methanococcus jannaschii)	A	MJ	381	MJ0438	WP_010869937.1;
Q59034	Q59034	TRMY_METJA	tRNA (pseudouridine(54)-N(1))-methyltransferase (EC 2.1.1.257)	TrmY	trmY MJ1640	Methanocaldococcus jannaschii (strain ATCC 43067 / DSM 2661 / JAL-1 / JCM 10045 / NBRC 100440) (Methanococcus jannaschii)	A	MJ	205	MJ1640	WP_010871164.1;
Q8TWU6	Q8TWU6	CDAT8_METKA	tRNA(cytosine(8)) deaminase (EC 3.5.4.35) (Cytidine deaminase acting on tRNA base C8) (CDAT8)	CDAT8	MK0935	Methanopyrus kandleri (strain AV19 / DSM 6324 / JCM 9639 / NBRC 100938)	A	MK	278	MK0935
Q91WE6	Q91WE6	CDKAL_MOUSE	Threonylcarbamoyladenosine tRNA methylthiotransferase (EC 2.8.4.5) (CDK5 regulatory subunit-associated protein 1-like 1) (tRNA-t(6)A37 methylthiotransferase)	MtaB	Cdkal1	Mus musculus (Mouse)	E	MM	578		NP_001295415.1 [Q91WE6-5];NP_653119.1 [Q91WE6-1];
O33253	P9WFZ1	TRMI_MYCTU	tRNA (adenine(58)-N(1))-methyltransferase TrmI (EC 2.1.1.220) (tRNA(m1A58)-methyltransferase) (tRNA(m1A58)MTase)	#N/A	trmI Rv2118c	Mycobacterium tuberculosis (strain ATCC 25618 / H37Rv)	B	MT	280	Rv2118c	NP_216634.1;WP_003411041.1;
O33253	P9WFZ0	TRMI_MYCTO	tRNA (adenine(58)-N(1))-methyltransferase TrmI (EC 2.1.1.220) (tRNA(m1A58)-methyltransferase) (tRNA(m1A58)MTase)	#N/A	trmI MT2178	Mycobacterium tuberculosis (strain CDC 1551 / Oshkosh)	B	MT	280	MT2178	WP_003411041.1;
Q8YN91	Q8YN91	MNME_NOSS1	tRNA modification GTPase MnmE (EC 3.6.-.-)	MnmE	mnmE trmE all4677	Nostoc sp. (strain PCC 7120 / SAG 25.82 / UTEX 2576)	B	NS	459	all4677			trmE
Q9UYD1	Q9UYD1	TRM56_PYRAB	tRNA (cytidine(56)-2'-O)-methyltransferase (EC 2.1.1.206) (tRNA ribose 2'-O-methyltransferase aTrm56)	aTrm56	PYRAB15770 PAB1040	Pyrococcus abyssi (strain GE5 / Orsay)	A	PA	198	PYRAB15770	WP_010868694.1;	PAB1040
Q9V1F9	Q9V1F9	TYW1_PYRAB	S-adenosyl-L-methionine-dependent tRNA 4-demethylwyosine synthase (EC 4.1.3.44) (tRNA wyosine derivatives biosynthesis protein Taw1)	Taw1	taw1 PYRAB04680 PAB2039	Pyrococcus abyssi (strain GE5 / Orsay)	A	PA	342	PYRAB04680		PAB2039
Q9V2G1	Q9V2G1	TAW22_PYRAB	tRNA (guanine(37)-N1)/4-demethylwyosine(37)-methyltransferase Taw22 (EC 2.1.1.-) (EC 2.1.1.228) (M1G-methyltransferase) (tRNA [GM37] methyltransferase) (tRNA(Phe):m1G/imG2 methyltransferase)	Taw22	taw22 trm5a PYRAB01130 PAB2272	Pyrococcus abyssi (strain GE5 / Orsay)	A	PA	333	PYRAB01130	WP_010867237.1;	PAB2272	trm5a
Q9UY84	Q9UY84	TMG10_PYRAB	tRNA (guanine(10)-N2)-dimethyltransferase (EC 2.1.1.213) ((Pab)Trm-G10) (tRNA:G10 dimethyltransferase)	Trm-G10	trmG10 PYRAB16240 PAB1283	Pyrococcus abyssi (strain GE5 / Orsay)	A	PA	329	PYRAB16240		PAB1283
Q9V106	Q9V106	TRCM_PYRAB	tRNA (cytosine(49)-C(5))-methyltransferase (EC 2.1.1.-)	Trm4	PYRAB06230 PAB1947	Pyrococcus abyssi (strain GE5 / Orsay)	A	PA	311	PYRAB06230	WP_010867747.1;	PAB1947
Q9V0Q0	Q9V0Q0	TRM5B_PYRAB	tRNA (guanine(37)-N1)-methyltransferase Trm5b (EC 2.1.1.228) (M1G-methyltransferase) (tRNA [GM37] methyltransferase)	Trm5b	trm5b PYRAB07390 PAB0505	Pyrococcus abyssi (strain GE5 / Orsay)	A	PA	330	PYRAB07390	WP_010867861.1;	PAB0505
Q9V1J7	Q9V1J7	TRMI_PYRAB	tRNA (adenine(57)-N(1)/adenine(58)-N(1))-methyltransferase TrmI (EC 2.1.1.219) (tRNA(m1A57/58)-methyltransferase)	TrmI	trmI pimT-like PYRAB04300 PAB0283	Pyrococcus abyssi (strain GE5 / Orsay)	A	PA	253	PYRAB04300	WP_010867553.1;	PAB0283	pimT-like
Q9UZR7	Q9UZR7	ATRMA_PYRAB	tRNA (uracil(54)-C(5))-methyltransferase (EC 2.1.1.35) (PabTrmU54) (tRNA(m5U54)-methyltransferase) (RUMT)	TrmU54	PYRAB10780 PAB0719	Pyrococcus abyssi (strain GE5 / Orsay)	A	PA	405	PYRAB10780	WP_010868196.1;	PAB0719
Q7LWY0	Q7LWY0	TRUB_PYRFU	Probable tRNA pseudouridine synthase B (EC 5.4.99.25) (tRNA pseudouridine(55) synthase) (Psi55 synthase) (tRNA pseudouridylate synthase) (tRNA-uridine isomerase)	Cbf5	truB PF1785	Pyrococcus furiosus (strain ATCC 43587 / DSM 3638 / JCM 8422 / Vc1)	A	PF	340	PF1785	WP_011012926.1;
Q8TZI1	Q8TZI1	Q8TZI1_PYRFU	KEOPS complex subunit Pcc1	Pcc1	PF2011	Pyrococcus furiosus (strain ATCC 43587 / DSM 3638 / JCM 8422 / Vc1)	A	PF	82		WP_011013156.1;	PF2011
Q8U1R6	Q8U1R6	PUS10_PYRFU	tRNA pseudouridine synthase Pus10 (EC 5.4.99.25) (tRNA pseudouridine 54/55 synthase) (Psi54/55 synthase)	Pus10	pus10 psuX PF1139	Pyrococcus furiosus (strain ATCC 43587 / DSM 3638 / JCM 8422 / Vc1)	A	PF	388	PF1139	WP_011012279.1;		psuX
Q8TZX0	Q8TZX0	Q8TZX0_PYRFU	tRNA(Ile2) 2-agmatinylcytidine synthetase TiaS (tRNA(Ile2)-agm2C synthetase) (EC 6.3.4.22) (tRNA(Ile2) agmatidine synthetase)	TiaS	tiaS PF1855	Pyrococcus furiosus (strain ATCC 43587 / DSM 3638 / JCM 8422 / Vc1)	A	PF	424		WP_011012995.1;	PF1855
O58214	O58214	TRM56_PYRHO	tRNA (cytidine(56)-2'-O)-methyltransferase (EC 2.1.1.206) (tRNA ribose 2'-O-methyltransferase aTrm56)	aTrm56	PH0461	Pyrococcus horikoshii (strain ATCC 700860 / DSM 12428 / JCM 9974 / NBRC 100139 / OT-3)	A	PH	203	PH0461	WP_048053133.1;
O59412	O59412	TYW1_PYRHO	S-adenosyl-L-methionine-dependent tRNA 4-demethylwyosine synthase (EC 4.1.3.44) (tRNA wyosine derivatives biosynthesis protein Taw1)	Taw1	taw1 PH1705	Pyrococcus horikoshii (strain ATCC 700860 / DSM 12428 / JCM 9974 / NBRC 100139 / OT-3)	A	PH	342	PH1705
O58523	O58523	TYW2_PYRHO	tRNA(Phe) (4-demethylwyosine(37)-C(7)) aminocarboxypropyltransferase (EC 2.5.1.114) (PhTYW2) (tRNA wyosine derivatives biosynthesis protein Taw2)	Taw2	taw2 PH0793	Pyrococcus horikoshii (strain ATCC 700860 / DSM 12428 / JCM 9974 / NBRC 100139 / OT-3)	A	PH	278	PH0793	WP_010884887.1;
O58843	O58843	ATGT_PYRHO	tRNA-guanine(15) transglycosylase (EC 2.4.2.48) (7-cyano-7-deazaguanine tRNA-ribosyltransferase) (Archaeal tRNA-guanine transglycosylase)	TgtA	tgtA PH1116	Pyrococcus horikoshii (strain ATCC 700860 / DSM 12428 / JCM 9974 / NBRC 100139 / OT-3)	A	PH	582	PH1116	WP_010885200.1;
O59493	O59493	TRM1_PYRHO	tRNA (guanine(26)-N(2))-dimethyltransferase (EC 2.1.1.216) (tRNA 2,2-dimethylguanosine-26 methyltransferase) (tRNA(guanine-26,N(2)-N(2)) methyltransferase) (tRNA(m(2,2)G26)dimethyltransferase)	Trm1	trm1 PH1829	Pyrococcus horikoshii (strain ATCC 700860 / DSM 12428 / JCM 9974 / NBRC 100139 / OT-3)	A	PH	381	PH1829
P53323	P53323	BUD32_YEAST	EKC/KEOPS complex subunit BUD32 (EC 3.6.-.-) (Atypical serine/threonine protein kinase BUD32) (EC 2.7.11.1) (Bud site selection protein 32) (Low-dye-binding protein 14) (piD261)	Bud32	BUD32 LDB14 YGR262C	Saccharomyces cerevisiae (strain ATCC 204508 / S288c) (Baker's yeast)	E	SC	261	YGR262C	NP_011778.1;		LDB14
P33322	P33322	CBF5_YEAST	H/ACA ribonucleoprotein complex subunit CBF5 (EC 5.4.99.-) (Centromere-binding factor 5) (Centromere/microtubule-binding protein CBF5) (H/ACA snoRNP protein CBF5) (Small nucleolar RNP protein CBF5) (p64')	Cbf5	CBF5 YLR175W L9470.11	Saccharomyces cerevisiae (strain ATCC 204508 / S288c) (Baker's yeast)	E	SC	483	YLR175W	NP_013276.1;	L9470.11
Q03705	Q03705	CG121_YEAST	EKC/KEOPS complex subunit CGI121 (CGI-121 homolog)	Cgi121	CGI121 YML036W	Saccharomyces cerevisiae (strain ATCC 204508 / S288c) (Baker's yeast)	E	SC	181	YML036W	NP_013676.2;
P53759	P53759	DUS1_YEAST	tRNA-dihydrouridine(16/17) synthase [NAD(P)(+)] (EC 1.3.1.88) (mRNA-dihydrouridine synthase DUS1) (EC 1.3.1.-) (tRNA-dihydrouridine synthase 1)	Dus1	DUS1 YML080W	Saccharomyces cerevisiae (strain ATCC 204508 / S288c) (Baker's yeast)	E	SC	423	YML080W	NP_013631.1;
P53720	P53720	DUS2_YEAST	tRNA-dihydrouridine(20) synthase [NAD(P)+] (EC 1.3.1.91) (mRNA-dihydrouridine synthase DUS2) (EC 1.3.1.-) (tRNA-dihydrouridine synthase 2)	Dus2	SMM1 DUS2 YNR015W N2065	Saccharomyces cerevisiae (strain ATCC 204508 / S288c) (Baker's yeast)	E	SC	384	YNR015W	NP_014412.1;	N2065	DUS2
Q06053	Q06053	DUS3_YEAST	tRNA-dihydrouridine(47) synthase [NAD(P)(+)] (EC 1.3.1.89) (mRNA-dihydrouridine synthase DUS3) (EC 1.3.1.-) (tRNA-dihydrouridine synthase 3)	Dus3	DUS3 YLR401C L8084.19	Saccharomyces cerevisiae (strain ATCC 204508 / S288c) (Baker's yeast)	E	SC	668	YLR401C	NP_013505.4;	L8084.19
Q06063	Q06063	DUS4_YEAST	tRNA-dihydrouridine(20a/20b) synthase [NAD(P)+] (EC 1.3.1.90) (mRNA-dihydrouridine synthase DUS4) (EC 1.3.1.-) (tRNA-dihydrouridine synthase 4)	Dus4	DUS4 YLR405W L8084.2	Saccharomyces cerevisiae (strain ATCC 204508 / S288c) (Baker's yeast)	E	SC	367	YLR405W	NP_013509.1;	L8084.2
Q06706	Q06706	ELP1_YEAST	Elongator complex protein 1 (Gamma-toxin target 1) (Protein IKI3)	Elp1	IKI3 ELP1 TOT1 YLR384C L3502.7	Saccharomyces cerevisiae (strain ATCC 204508 / S288c) (Baker's yeast)	E	SC	1349	YLR384C	NP_013488.3;	L3502.7	ELP1 TOT1
P42935	P42935	ELP2_YEAST	Elongator complex protein 2 (Gamma-toxin target 2)	Elp2	ELP2 TOT2 YGR200C G7725	Saccharomyces cerevisiae (strain ATCC 204508 / S288c) (Baker's yeast)	E	SC	788	YGR200C	NP_011716.3;	G7725	TOT2
Q02908	Q02908	ELP3_YEAST	Elongator complex protein 3 (EC 2.3.1.-) (Gamma-toxin target 3) (tRNA uridine(34) acetyltransferase)	Elp3	ELP3 HPA1 TOT3 YPL086C	Saccharomyces cerevisiae (strain ATCC 204508 / S288c) (Baker's yeast)	E	SC	557	YPL086C	NP_015239.1;		HPA1 TOT3
Q02884	Q02884	ELP4_YEAST	Elongator complex protein 4 (Gamma-toxin target 7) (HAT-associated protein 1)	Elp4	ELP4 HAP1 TOT7 YPL101W	Saccharomyces cerevisiae (strain ATCC 204508 / S288c) (Baker's yeast)	E	SC	456	YPL101W	NP_015224.1;		HAP1 TOT7
P38874	P38874	ELP5_YEAST	Elongator complex protein 5 (Gamma-toxin target 5) (HAT-associated protein 2) (Protein IKI1)	Elp5	IKI1 ELP5 HAP2 TOT5 YHR187W	Saccharomyces cerevisiae (strain ATCC 204508 / S288c) (Baker's yeast)	E	SC	309	YHR187W	NP_012057.3;		ELP5 HAP2 TOT5
Q04868	Q04868	ELP6_YEAST	Elongator complex protein 6 (Gamma-toxin target 6) (HAT-associated protein 3)	Elp6	ELP6 HAP3 TOT6 YMR312W YM9924.04	Saccharomyces cerevisiae (strain ATCC 204508 / S288c) (Baker's yeast)	E	SC	273	YMR312W	NP_014043.1;	YM9924.04	HAP3 TOT6
Q3E840	Q3E840	DPH3_YEAST	Diphthamide biosynthesis protein 3 (Kluyveromyces lactis toxin-insensitive protein 11)	Kti11	KTI11 DPH3 YBL071W-A	Saccharomyces cerevisiae (strain ATCC 204508 / S288c) (Baker's yeast)	E	SC	82	YBL071W-A	NP_660100.1;		DPH3
P34253	P34253	KTI12_YEAST	Protein KTI12 (Gamma-toxin target protein 4) (Killer toxin insensitivity protein 12)	Kti12	KTI12 YKL110C YKL446 YKL500	Saccharomyces cerevisiae (strain ATCC 204508 / S288c) (Baker's yeast)	E	SC	313	YKL110C	NP_012812.1;	YKL446 YKL500
P31386	P31386	ATS1_YEAST	Protein KTI13 (Alpha-tubulin suppressor 1) (Kluyveromyces lactis toxin-insensitive protein 13)	Kti13	ATS1 KTI13 YAL020C FUN28 YAL006	Saccharomyces cerevisiae (strain ATCC 204508 / S288c) (Baker's yeast)	E	SC	333	YAL020C	NP_009382.2;	FUN28 YAL006	KTI13
P29295	P29295	HRR25_YEAST	Casein kinase I homolog HRR25 (EC 2.7.11.1)	Kti14	HRR25 YPL204W	Saccharomyces cerevisiae (strain ATCC 204508 / S288c) (Baker's yeast)	E	SC	494	YPL204W	NP_015120.1;
P07884	P07884	MOD5_YEAST	tRNA dimethylallyltransferase (DMATase) (EC 2.5.1.75) (Isopentenyl-diphosphate: tRNA isopentenyltransferase) (IPP transferase) (IPPT) (tRNA isopentenyltransferase) (IPTase)	Mod5	MOD5 YOR274W	Saccharomyces cerevisiae (strain ATCC 204508 / S288c) (Baker's yeast)	E	SC	428	YOR274W	NP_014917.3 [P07884-1];
P32559	P32559	MSS1_YEAST	tRNA modification GTPase MSS1, mitochondrial	Mss1	MSS1 PET53 YMR023C YM9711.13C	Saccharomyces cerevisiae (strain ATCC 204508 / S288c) (Baker's yeast)	E	SC	526	YMR023C	NP_013736.1;	YM9711.13C	PET53
P53070	P53070	MTO1_YEAST	Mitochondrial translation optimization protein 1	Mto1	MTO1 IPS1 YGL236C	Saccharomyces cerevisiae (strain ATCC 204508 / S288c) (Baker's yeast)	E	SC	669	YGL236C	NP_011278.2;		IPS1
Q12093	Q12093	MTU1_YEAST	Mitochondrial tRNA-specific 2-thiouridylase 1 (EC 2.8.1.14) (Mitochondrial translation optimization protein 2) (Synthetic lethal with MSS4 3)	Mtu1	SLM3 MTO2 MTU1 YDL033C D2761	Saccharomyces cerevisiae (strain ATCC 204508 / S288c) (Baker's yeast)	E	SC	417	YDL033C	NP_010251.1;	D2761	MTO2 MTU1
P53923	P53923	CTU2_YEAST	Cytoplasmic tRNA 2-thiolation protein 2 (Needs CLA4 to survive protein 2) (Thiolation of uridine in cytoplasmic tRNA protein 2)	Ncs2	NCS2 CTU2 TUC2 YNL119W N1913	Saccharomyces cerevisiae (strain ATCC 204508 / S288c) (Baker's yeast)	E	SC	493	YNL119W	NP_014280.3;	N1913	CTU2 TUC2
P53088	P53088	CTU1_YEAST	Cytoplasmic tRNA 2-thiolation protein 1 (EC 2.7.7.-) (Cytoplasmic tRNA adenylyltransferase 1) (Needs CLA4 to survive protein 6) (Thiolation of uridine in cytoplasmic tRNA protein 1)	Ncs6	NCS6 CTU1 TUC1 YGL211W YGL210W-A	Saccharomyces cerevisiae (strain ATCC 204508 / S288c) (Baker's yeast)	E	SC	359	YGL211W	NP_011304.2;	YGL210W-A	CTU1 TUC1
Q3E833	Q3E833	PCC1_YEAST	EKC/KEOPS complex subunit PCC1 (Polarized growth chromatin-associated controller 1)	Pcc1	PCC1 YKR095W-A	Saccharomyces cerevisiae (strain ATCC 204508 / S288c) (Baker's yeast)	E	SC	88	YKR095W-A	NP_878113.4;
Q12211	Q12211	PUS1_YEAST	tRNA pseudouridine synthase 1 (EC 5.4.99.-) (tRNA pseudouridylate synthase 1) (tRNA-uridine isomerase 1)	Pus1	PUS1 YPL212C	Saccharomyces cerevisiae (strain ATCC 204508 / S288c) (Baker's yeast)	E	SC	544	YPL212C	NP_015112.1;
P53167	P53167	PUS2_YEAST	tRNA pseudouridine(27/28) synthase (EC 5.4.99.44) (tRNA pseudouridine synthase 2) (tRNA pseudouridylate synthase 2) (tRNA-uridine isomerase 2)	Pus2	PUS2 YGL063W	Saccharomyces cerevisiae (strain ATCC 204508 / S288c) (Baker's yeast)	E	SC	370	YGL063W	NP_011452.4;
P31115	P31115	PUS3_YEAST	tRNA pseudouridine(38/39) synthase (EC 5.4.99.45) (Depressed growth-rate protein DEG1) (tRNA pseudouridine synthase 3) (tRNA pseudouridylate synthase 3) (tRNA-uridine isomerase 3)	Pus3	DEG1 HRM3 PUS3 YFL001W	Saccharomyces cerevisiae (strain ATCC 204508 / S288c) (Baker's yeast)	E	SC	442	YFL001W	NP_116655.1;		HRM3 PUS3
P48567	P48567	PUS4_YEAST	tRNA pseudouridine synthase 4 (EC 5.4.99.25) (tRNA pseudouridine(55) synthase) (Psi55 synthase) (tRNA pseudouridylate synthase 4) (tRNA-uridine isomerase 4)	Pus4	PUS4 YNL292W N0480	Saccharomyces cerevisiae (strain ATCC 204508 / S288c) (Baker's yeast)	E	SC	403	YNL292W	NP_014107.1;	N0480
P53294	P53294	PUS6_YEAST	tRNA pseudouridine(31) synthase (EC 5.4.99.42) (Pseudouridine synthase 6) (Pseudouridylate synthase 6) (Uracil hydrolyase) (tRNA pseudouridine 31 synthase) (PSI31 synthase)	Pus6	PUS6 YGR169C	Saccharomyces cerevisiae (strain ATCC 204508 / S288c) (Baker's yeast)	E	SC	404	YGR169C	NP_011685.3;
Q12362	Q12362	RIB2_YEAST	Bifunctional protein RIB2 [Includes: tRNA pseudouridine(32) synthase, cytoplasmic (EC 5.4.99.28) (tRNA pseudouridine synthase 8) (tRNA pseudouridylate synthase 8) (tRNA-uridine isomerase 8); Diaminohydroxyphosphoribosylaminopyrimidine deaminase (DRAP deaminase) (EC 3.5.4.26) (Riboflavin-specific deaminase)]	Pus8	RIB2 PUS8 YOL066C	Saccharomyces cerevisiae (strain ATCC 204508 / S288c) (Baker's yeast)	E	SC	591	YOL066C	NP_014575.1;		PUS8
Q12069	Q12069	PUS9_YEAST	tRNA pseudouridine(32) synthase, mitochondrial (EC 5.4.99.28) (tRNA pseudouridine synthase 9) (tRNA pseudouridylate synthase 9) (tRNA-uridine isomerase 9)	Pus9	PUS9 YDL036C D2743	Saccharomyces cerevisiae (strain ATCC 204508 / S288c) (Baker's yeast)	E	SC	462	YDL036C	NP_010248.1;	D2743
P43122	P43122	QRI7_YEAST	tRNA N6-adenosine threonylcarbamoyltransferase, mitochondrial (EC 2.3.1.234) (N6-L-threonylcarbamoyladenine synthase) (t(6)A synthase) (t(6)A37 threonylcarbamoyladenosine biosynthesis protein QRI7) (tRNA threonylcarbamoyladenosine biosynthesis protein QRI7)	Qri7	QRI7 YDL104C D2366	Saccharomyces cerevisiae (strain ATCC 204508 / S288c) (Baker's yeast)	E	SC	407	YDL104C	NP_010179.1;	D2366
P23796	P23796	RIT1_YEAST	tRNA A64-2'-O-ribosylphosphate transferase (EC 2.4.2.-) (Initiator tRNA phosphoribosyl-transferase)	Rit1	RIT1 YMR283C YM8021.09C	Saccharomyces cerevisiae (strain ATCC 204508 / S288c) (Baker's yeast)	E	SC	513	YMR283C	NP_014010.1;	YM8021.09C
P53914	P53914	NAT10_YEAST	RNA cytidine acetyltransferase (EC 2.3.1.-) (18S rRNA cytosine acetyltransferase) (Killer toxin-resistance protein 33) (Ribosomal RNA cytidine acetyltransferase 1)	Rra1	KRE33 NAT10 RRA1 YNL132W N1216 N1858	Saccharomyces cerevisiae (strain ATCC 204508 / S288c) (Baker's yeast)	E	SC	1056	YNL132W	NP_014267.1;	N1216 N1858	NAT10 RRA1
P32579	P32579	SUA5_YEAST	Threonylcarbamoyl-AMP synthase (TC-AMP synthase) (EC 2.7.7.87) (L-threonylcarbamoyladenylate synthase) (Suppressor of upstream AUG protein 5) (t(6)A37 threonylcarbamoyladenosine biosynthesis protein SUA5) (tRNA threonylcarbamoyladenosine biosynthesis protein SUA5)	Sua5	SUA5 YGL169W G1660	Saccharomyces cerevisiae (strain ATCC 204508 / S288c) (Baker's yeast)	E	SC	426	YGL169W	NP_011346.1;	G1660
P53065	P53065	TAD1_YEAST	tRNA-specific adenosine deaminase 1 (EC 3.5.4.34) (tRNA-specific adenosine-37 deaminase)	Tad1	TAD1 YGL243W HRA400	Saccharomyces cerevisiae (strain ATCC 204508 / S288c) (Baker's yeast)	E	SC	400	YGL243W	NP_011271.1;	HRA400
P47058	P47058	TAD2_YEAST	tRNA-specific adenosine deaminase subunit TAD2 (EC 3.5.4.33) (tRNA-specific adenosine-34 deaminase subunit TAD2)	Tad2	TAD2 YJL035C J1246	Saccharomyces cerevisiae (strain ATCC 204508 / S288c) (Baker's yeast)	E	SC	250	YJL035C	NP_012499.1;	J1246
Q9URQ3	Q9URQ3	TAD3_YEAST	tRNA-specific adenosine deaminase subunit TAD3 (tRNA-specific adenosine-34 deaminase subunit TAD3)	Tad3	TAD3 YLR316C	Saccharomyces cerevisiae (strain ATCC 204508 / S288c) (Baker's yeast)	E	SC	322	YLR316C	NP_013420.2;
P53072	P53072	TAN1_YEAST	tRNA acetyltransferase TAN1 (EC 2.3.-.-)	Tan1	TAN1 YGL232W	Saccharomyces cerevisiae (strain ATCC 204508 / S288c) (Baker's yeast)	E	SC	289	YGL232W	NP_011282.1;
P53215	P53215	THG1_YEAST	tRNA(His) guanylyltransferase (EC 2.7.7.79) (tRNA-histidine guanylyltransferase)	Thg1	THG1 YGR024C	Saccharomyces cerevisiae (strain ATCC 204508 / S288c) (Baker's yeast)	E	SC	237	YGR024C	NP_011538.3;
P15565	P15565	TRM1_YEAST	tRNA (guanine(26)-N(2))-dimethyltransferase, mitochondrial (EC 2.1.1.216) (tRNA 2,2-dimethylguanosine-26 methyltransferase) (tRNA(guanine-26,N(2)-N(2)) methyltransferase) (tRNA(m(2,2)G26)dimethyltransferase)	Trm1	TRM1 YDR120C YD9727.15C	Saccharomyces cerevisiae (strain ATCC 204508 / S288c) (Baker's yeast)	E	SC	570	YDR120C	NP_010405.3 [P15565-1];	YD9727.15C
Q12400	Q12400	TRM10_YEAST	tRNA (guanine(9)-N1)-methyltransferase (EC 2.1.1.221) (tRNA methyltransferase 10) (tRNA(m1G9)-methyltransferase) (tRNA(m1G9)MTase)	Trm10	TRM10 YOL093W O0926	Saccharomyces cerevisiae (strain ATCC 204508 / S288c) (Baker's yeast)	E	SC	293	YOL093W	NP_014548.1;	O0926
Q12463	Q12463	TRM11_YEAST	tRNA (guanine(10)-N2)-methyltransferase (EC 2.1.1.214) (tRNA [Gm10] methyltransferase) (tRNA guanosine-2'-O-methyltransferase TRM11) (tRNA methylase 11)	Trm11	TRM11 YOL124C	Saccharomyces cerevisiae (strain ATCC 204508 / S288c) (Baker's yeast)	E	SC	433	YOL124C	NP_014517.1;
P53738	P53738	TR112_YEAST	Multifunctional methyltransferase subunit TRM112 (eRF1 methyltransferase subunit TRM112) (eRF1 MTase subunit TRM112) (tRNA methyltransferase 112)	Trm112	TRM112 YNR046W N3445	Saccharomyces cerevisiae (strain ATCC 204508 / S288c) (Baker's yeast)	E	SC	135	YNR046W	NP_014444.1;	N3445
Q12383	Q12383	TRM13_YEAST	tRNA:m(4)X modification enzyme TRM13 (EC 2.1.1.225) (tRNA methylase 13)	Trm13	TRM13 YOL125W	Saccharomyces cerevisiae (strain ATCC 204508 / S288c) (Baker's yeast)	E	SC	476	YOL125W	NP_014516.1;
Q08641	Q08641	AB140_YEAST	tRNA(Thr) (cytosine(32)-N(3))-methyltransferase (EC 2.1.1.268) (Actin-binding protein of 140 kDa) (tRNA methyltransferase of 140 kDa)	Trm140	ABP140 TRM140 YOR239W YOR240W	Saccharomyces cerevisiae (strain ATCC 204508 / S288c) (Baker's yeast)	E	SC	628	YOR239W	NP_014882.4 [Q08641-1];	YOR240W	TRM140
P33753	P33753	TRM2_YEAST	tRNA (uracil(54)-C(5))-methyltransferase (EC 2.1.1.35) (Transfer RNA methyltransferase 2) (tRNA(m5U54)-methyltransferase)	Trm2	TRM2 NUC2 NUD1 RNC1 YKR056W	Saccharomyces cerevisiae (strain ATCC 204508 / S288c) (Baker's yeast)	E	SC	639	YKR056W	NP_012982.2;		NUC2 NUD1 RNC1
Q07527	Q07527	TRM3_YEAST	tRNA (guanosine(18)-2'-O)-methyltransferase (EC 2.1.1.34) (tRNA [Gm18] ribose methylase) (tRNA methyltransferase 3)	Trm3	TRM3 YDL112W	Saccharomyces cerevisiae (strain ATCC 204508 / S288c) (Baker's yeast)	E	SC	1436	YDL112W	NP_010171.1;
P38205	P38205	NCL1_YEAST	Multisite-specific tRNA:(cytosine-C(5))-methyltransferase (EC 2.1.1.202) (Multisite-specific tRNA:m5C-methyltransferase) (tRNA (cytosine-5-)-methyltransferase NCL1) (tRNA methyltransferase 4)	Trm4	NCL1 TRM4 YBL024W YBL0437	Saccharomyces cerevisiae (strain ATCC 204508 / S288c) (Baker's yeast)	E	SC	684	YBL024W	NP_009529.1;	YBL0437	TRM4
Q02648	Q02648	TRM44_YEAST	tRNA (uracil-O(2)-)-methyltransferase (EC 2.1.1.211) (tRNA(Ser) (uridine(44)-2'-O)-methyltransferase) (tRNA Um(44) 2'-O-methyltransferase)	Trm44	TRM44 YPL030W	Saccharomyces cerevisiae (strain ATCC 204508 / S288c) (Baker's yeast)	E	SC	567	YPL030W	NP_015295.1;
P38793	P38793	TRM5_YEAST	tRNA (guanine(37)-N1)-methyltransferase (EC 2.1.1.228) (M1G-methyltransferase) (tRNA [GM37] methyltransferase) (tRNA methyltransferase 5)	Trm5	TRM5 YHR070W	Saccharomyces cerevisiae (strain ATCC 204508 / S288c) (Baker's yeast)	E	SC	499	YHR070W	NP_011937.1;
P41814	P41814	TRM6_YEAST	tRNA (adenine(58)-N(1))-methyltransferase non-catalytic subunit TRM6 (General control non-derepressible protein 10) (Protein GCD10) (tRNA(m1A58)-methyltransferase subunit TRM6) (tRNA(m1A58)MTase subunit TRM6)	Trm6	GCD10 TIF33 TRM6 YNL062C N2422	Saccharomyces cerevisiae (strain ATCC 204508 / S288c) (Baker's yeast)	E	SC	478	YNL062C	NP_014337.3;	N2422	TIF33 TRM6
P46959	P46959	TRM61_YEAST	tRNA (adenine(58)-N(1))-methyltransferase catalytic subunit TRM61 (EC 2.1.1.220) (General control non-derepressible protein 14) (Protein GCD14) (tRNA(m1A58)-methyltransferase subunit TRM61) (tRNA(m1A58)MTase subunit TRM61)	Trm61	GCD14 TRM61 YJL125C J0710	Saccharomyces cerevisiae (strain ATCC 204508 / S288c) (Baker's yeast)	E	SC	383	YJL125C	NP_012410.1;	J0710	TRM61
P38238	P38238	TRM7_YEAST	tRNA (cytidine(32)/guanosine(34)-2'-O)-methyltransferase (EC 2.1.1.205) (2'-O-ribose RNA methyltransferase TRM7) (tRNA methylase 7)	Trm7	TRM7 YBR061C YBR0527	Saccharomyces cerevisiae (strain ATCC 204508 / S288c) (Baker's yeast)	E	SC	310	YBR061C	NP_009617.3;	YBR0527
Q12009	Q12009	TRMB_YEAST	tRNA (guanine-N(7)-)-methyltransferase (EC 2.1.1.33) (Transfer RNA methyltransferase 8) (tRNA (guanine(46)-N(7))-methyltransferase) (tRNA(m7G46)-methyltransferase)	Trm8	TRM8 YDL201W D1075	Saccharomyces cerevisiae (strain ATCC 204508 / S288c) (Baker's yeast)	E	SC	286	YDL201W	NP_010080.1;	D1075
Q03774	Q03774	TRM82_YEAST	tRNA (guanine-N(7)-)-methyltransferase non-catalytic subunit TRM82 (Transfer RNA methyltransferase 82)	Trm82	TRM82 YDR165W YD8358.19	Saccharomyces cerevisiae (strain ATCC 204508 / S288c) (Baker's yeast)	E	SC	444	YDR165W	NP_010449.1;	YD8358.19
P49957	P49957	TRM9_YEAST	tRNA (carboxymethyluridine(34)-5-O)-methyltransferase (EC 2.1.1.229) (tRNA (uracil-5-)-methyltransferase TRM9) (tRNA [Um34] methyltransferase) (tRNA methylase 9)	Trm9	TRM9 YML014W YM9571.04	Saccharomyces cerevisiae (strain ATCC 204508 / S288c) (Baker's yeast)	E	SC	279	YML014W	NP_013698.1;	YM9571.04
Q08686	Q08686	THTR_YEAST	Thiosulfate sulfurtransferase TUM1 (EC 2.8.1.1) (Thiouridine modification protein 1)	Tum1	TUM1 YOR251C	Saccharomyces cerevisiae (strain ATCC 204508 / S288c) (Baker's yeast)	E	SC	304	YOR251C	NP_014894.3;
Q08960	Q08960	TYW1_YEAST	S-adenosyl-L-methionine-dependent tRNA 4-demethylwyosine synthase (EC 4.1.3.44) (tRNA wybutosine-synthesizing protein 1)	TYW1	TYW1 YPL207W	Saccharomyces cerevisiae (strain ATCC 204508 / S288c) (Baker's yeast)	E	SC	810	YPL207W	NP_015117.1;
Q04235	Q04235	TYW2_YEAST	tRNA wybutosine-synthesizing protein 2 (tRNA-yW-synthesizing protein 2) (EC 2.5.1.114) (tRNA(Phe) (4-demethylwyosine(37)-C(7)) aminocarboxypropyltransferase)	TYW2	TRM12 TYW2 YML005W YM9571.14	Saccharomyces cerevisiae (strain ATCC 204508 / S288c) (Baker's yeast)	E	SC	462	YML005W	NP_013709.1;	YM9571.14	TYW2
P53177	P53177	TYW3_YEAST	tRNA wybutosine-synthesizing protein 3 (tRNA-yW-synthesizing protein 3) (EC 2.1.1.282) (tRNA(Phe) 7-((3-amino-3-carboxypropyl)-4-demethylwyosine(37)-N(4))-methyltransferase)	TYW3	TYW3 YGL050W	Saccharomyces cerevisiae (strain ATCC 204508 / S288c) (Baker's yeast)	E	SC	273	YGL050W	NP_011465.3;
Q08282	Q08282	TYW4_YEAST	tRNA wybutosine-synthesizing protein 4 (tRNA yW-synthesizing protein 4) (EC 2.1.1.290) (EC 2.3.1.231) (tRNA(Phe) (7-(3-amino-3-(methoxycarbonyl)propyl)wyosine(37)-N)-methoxycarbonyltransferase) (tRNA(Phe) (7-(3-amino-3-carboxypropyl)wyosine(37)-O)-methyltransferase)	TYW4	PPM2 TYW4 YOL141W	Saccharomyces cerevisiae (strain ATCC 204508 / S288c) (Baker's yeast)	E	SC	695	YOL141W	NP_014500.2;		TYW4
Q08015	Q08015	MIAE_SALTY	tRNA 2-(methylsulfanyl)-N(6)-isopentenyladenosine(37) hydroxylase (EC 1.14.99.69) (2-methylthio-N6-isopentenyladenosine(37)-tRNA monooxygenase) (tRNA-(ms[2]io[6]A37)-hydroxylase)	MiaE	miaE STM4471	Salmonella typhimurium (strain LT2 / SGSC1412 / ATCC 700720)	B	ST	270	STM4471	NP_463331.1;WP_000218459.1;
Q9HGQ2	Q9HGQ2	TRM4A_SCHPO	Multisite-specific tRNA:(cytosine-C(5))-methyltransferase trm4a (EC 2.1.1.-) (EC 2.1.1.203) (tRNA (cytosine-5-)-methyltransferase trm4a)	Trm4a	trm4a SPAC17D4.04 SPAC458.01	Schizosaccharomyces pombe (strain 972 / ATCC 24843) (Fission yeast)	E	SP	688		NP_594695.3;	SPAC17D4.04 SPAC458.01
O13935	O13935	TRM4B_SCHPO	Multisite-specific tRNA:(cytosine-C(5))-methyltransferase trm4b (EC 2.1.1.-) (tRNA (cytosine-5-)-methyltransferase trm4b)	Trm4b	trm4b SPAC23C4.17	Schizosaccharomyces pombe (strain 972 / ATCC 24843) (Fission yeast)	E	SP	685		NP_593189.2;	SPAC23C4.17
Q97T38	Q97T38	MNMA_STRPN	tRNA-specific 2-thiouridylase MnmA (EC 2.8.1.13)	MnmA	mnmA trmU SP_0118	Streptococcus pneumoniae serotype 4 (strain ATCC BAA-334 / TIGR4)	E	SP	373	SP_0118	WP_001282969.1;		trmU
Q4JB16	Q4JB16	TRMJ_SULAC	tRNA (cytidine-2'-O-)-methyltransferase TrmJ (EC 2.1.1.-) (tRNA (cytidine(32)-2'-O)-methyltransferase) (tRNA Cm32 methyltransferase)	TrmJ	trmJ Saci_0621	Sulfolobus acidocaldarius (strain ATCC 33909 / DSM 639 / JCM 8929 / NBRC 15157 / NCIMB 11770)	A	SA	235	Saci_0621	WP_011277515.1;
Q9WYA4	Q9WYA4	MNME_THEMA	tRNA modification GTPase MnmE (EC 3.6.5.-)	MnmE	mnmE trmE TM_0267	Thermotoga maritima (strain ATCC 43589 / DSM 3109 / JCM 10099 / NBRC 100826 / MSB8)	B	TM	450	TM_0267	NP_228080.1;WP_004082971.1;		trmE
Q5SID2	Q5SID2	TRMFO_THET8	Methylenetetrahydrofolate--tRNA-(uracil-5-)-methyltransferase TrmFO (EC 2.1.1.74) (Folate-dependent tRNA (uracil-5-)-methyltransferase) (Folate-dependent tRNA(M-5-U54)-methyltransferase)	TrmFO	trmFO TTHA1442	Thermus thermophilus (strain ATCC 27634 / DSM 579 / HB8)	B	TT	443	TTHA1442	WP_011228685.1;YP_144708.1;
Q9FAC4	Q5SM16	TRMH_THET8	tRNA (guanosine(18)-2'-O)-methyltransferase (EC 2.1.1.34) (tRNA [Gm18] methyltransferase)	#N/A	trmH TTHA0127	Thermus thermophilus (strain ATCC 27634 / DSM 579 / HB8)	B	TT	194	TTHA0127	WP_011174221.1;YP_143393.1;
Q8GBB2	Q8GBB2	TRMI_THET2	tRNA (adenine(58)-N(1))-methyltransferase TrmI (EC 2.1.1.220) (tRNA(m1A58)-methyltransferase) (tRNA(m1A58)MTase)	TrmI	trmI TT_C0244	Thermus thermophilus (strain ATCC BAA-163 / DSM 7039 / HB27)	B	TT	255	TT_C0244	WP_011172697.1;
Q72IH5	Q72IH5	TRMN_THET2	tRNA (guanine(6)-N2)-methyltransferase (EC 2.1.1.256) (tRNA:m2G6 methyltransferase)	TrmN	trmN TT_C1157	Thermus thermophilus (strain ATCC BAA-163 / DSM 7039 / HB27)	B	TT	335	TT_C1157	WP_011173568.1;
Q72LF3	Q72LF3	TTUA_THET2	tRNA-5-methyluridine(54) 2-sulfurtransferase (EC 2.8.1.15) (2-thiouridine synthetase TtuA) (tRNA two-thiouridine-synthesizing protein A)	TtuA	ttuA TT_C0106	Thermus thermophilus (strain ATCC BAA-163 / DSM 7039 / HB27)	B	TT	321	TT_C0106	WP_011172563.1;
Q57W17	Q57W17	Q57W17_TRYB2	Deaminase, putative (EC 3.5.4.-)	Tad2	Tb08.29H22.100 Tb927.8.4180	Trypanosoma brucei brucei (strain 927/4 GUTat10.1)	E	TB	225		XP_847249.1;	Tb927.8.4180
Q381Q7	Q381Q7	Q381Q7_TRYB2	Deaminase, putative	Tad3	Tb11.01.6930	Trypanosoma brucei brucei (strain 927/4 GUTat10.1)	E	TB	365		XP_829586.1;	Tb11.01.6930
Q9KV41	Q9KV41	Q9KV41_VIBCH	N-acetyltransferase domain-containing protein	AcpA	VC_0317	Vibrio cholerae serotype O1 (strain ATCC 39315 / El Tor Inaba N16961)	B	VS	148		NP_229971.1;	VC_0317
Q87K36	Q87K36	Q87K36_VIBPA	Putative ribosomal large chain pseudouridine synthase A	TrcP	VPA0062	Vibrio parahaemolyticus serotype O3:K6 (strain RIMD 2210633)	B	VP	559	VPA0062	NP_799572.1;WP_005482837.1;
Q8ZD36	Q8ZD36	MNMC_YERPE	tRNA 5-methylaminomethyl-2-thiouridine biosynthesis bifunctional protein MnmC (tRNA mnm(5)s(2)U biosynthesis bifunctional protein) [Includes: tRNA (mnm(5)s(2)U34)-methyltransferase (EC 2.1.1.61); FAD-dependent cmnm(5)s(2)U34 oxidoreductase (EC 1.5.-.-)]	MnmCD	mnmC YPO2756 y1590 YP_2407	Yersinia pestis	B	YP	689	YPO2756 y1590 YP_2407	WP_002209716.1;YP_002347703.1;
P28720	P28720	TGT_ZYMMO	Queuine tRNA-ribosyltransferase (EC 2.4.2.29) (Guanine insertion enzyme) (tRNA-guanine transglycosylase)	Tgt	tgt ZMO0363	Zymomonas mobilis subsp. mobilis (strain ATCC 31821 / ZM4 / CP4)	B	ZM	386	ZMO0363
